# Supplementary material
Source: PubMed Central journal article supplement (PMC5099230)
Supplement: bjsports-2015-095084-s3.pdf [file bjsports-2015-095084-s3.pdf]

**Tests for Publication Bias**

**Begg's Test**

adj. Kendall's Score (P-Q) = 24  
Std. Dev. of Score = 33.12  
Number of Studies = 21  
z = 0.72  
Pr > |z| = 0.469  
z = 0.69 (continuity corrected)  
Pr > |z| = 0.487 (continuity corrected)

**Egger's test**

|       | Std_Eff | Coef.    | Std. Err. | t    | P> t  | [95% Conf. Interval] |          |
|-------|---------|----------|-----------|------|-------|----------------------|----------|
| slope |         | .0753749 | .0673471  | 1.12 | 0.277 | -.0655842            | .2163339 |
| bias  |         | .4455488 | .942246   | 0.47 | 0.642 | -1.526595            | 2.417692 |

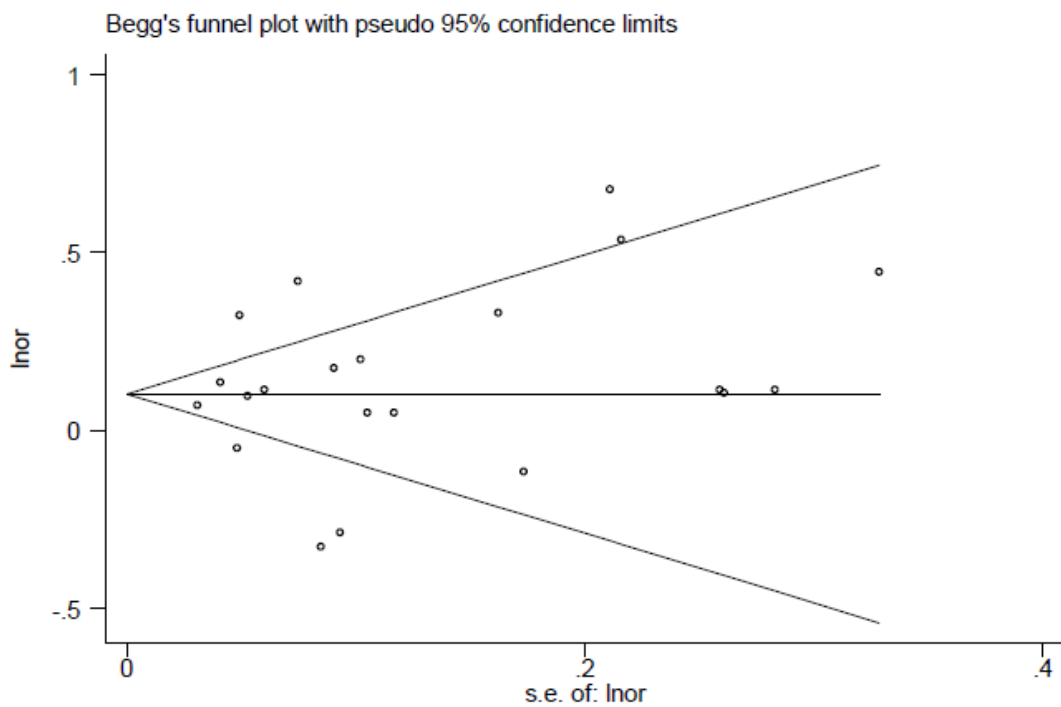

Figure S2. Funnel plot of publication bias.
