# Supplementary material
Source: PubMed Central journal article supplement (PMC5099230)
Supplement: bjsports-2015-095084-s5.pdf [file bjsports-2015-095084-s5.pdf]

| Table S2 . Risk of bias for included studies |                     |                               |                                                |                                               |                                            |                                                                                   |                                                                    |               |
|----------------------------------------------|---------------------|-------------------------------|------------------------------------------------|-----------------------------------------------|--------------------------------------------|-----------------------------------------------------------------------------------|--------------------------------------------------------------------|---------------|
| study                                        | design <sup>†</sup> | Appropriate source population | Appropriate measurement method for screen time | Appropriate measurement method for depression | Appropriate methods to control confounding | appropriate methods outlined to deal with any design-specific issues <sup>‡</sup> | Appropriate statistical methods (excluding control of confounding) | Quality score |
| Allahverdipour et al                         | CS                  | 1                             | 1                                              | 1                                             | 0                                          | 0                                                                                 | 0                                                                  | 3             |
| Bélanger et al                               | CS                  | 1                             | 1                                              | 1                                             | 0                                          | 0                                                                                 | 1                                                                  | 4             |
| Brunborg et al                               | LS                  | 1                             | 1                                              | 1                                             | 0                                          | 0                                                                                 | 1                                                                  | 4             |
| Cao et al                                    | CS                  | 1                             | 1                                              | 1                                             | 1                                          | 0                                                                                 | 1                                                                  | 5             |
| Casiano et al                                | CS                  | 1                             | 1                                              | 1                                             | 0                                          | 1                                                                                 | 1                                                                  | 5             |
| Chen et al                                   | LS                  | 1                             | 1                                              | 1                                             | 0                                          | 0                                                                                 | 0                                                                  | 3             |
| Desai et al                                  | CS                  | 1                             | 1                                              | 0                                             | 0                                          | 1                                                                                 | 1                                                                  | 4             |
| Godinho et al                                | CS                  | 1                             | 1                                              | 1                                             | 1                                          | 0                                                                                 | 1                                                                  | 5             |
| Hoare et al                                  | CS                  | 1                             | 1                                              | 1                                             | 1                                          | 0                                                                                 | 1                                                                  | 5             |
| Kim et al                                    | CS                  | 1                             | 1                                              | 0                                             | 1                                          | 0                                                                                 | 1                                                                  | 4             |
| Kremer et al                                 | CS                  | 1                             | 1                                              | 1                                             | 1                                          | 0                                                                                 | 1                                                                  | 5             |
| McHale et al                                 | LS                  | 1                             | 1                                              | 1                                             | 1                                          | 1                                                                                 | 1                                                                  | 6             |
| Messias et al                                | CS                  | 1                             | 1                                              | 0                                             | 1                                          | 1                                                                                 | 1                                                                  | 5             |
| Pantic et al                                 | CS                  | 0                             | 1                                              | 1                                             | 0                                          | 0                                                                                 | 0                                                                  | 2             |
| Primack et al                                | LC                  | 1                             | 1                                              | 1                                             | 1                                          | 1                                                                                 | 1                                                                  | 6             |
| Xin et al                                    | CS                  | 1                             | 1                                              | 1                                             | 0                                          | 1                                                                                 | 1                                                                  | 5             |

† CS, cross-sectional study; LS, longitudinal study; LC, longitudinal cohort study.

‡ appropriate methods outlined to deal with any design-specific issues including: recall bias, interviewer bias for cross-sectional studies; and biased loss to follow-up for longitudinal studies
